# Supplementary material
Source: PubMed Central journal article supplement (PMC4251616)
Supplement: chest_146_6_1543_ds01.pdf [file chest_146_6_1543_ds01.pdf]

# Increased Risk of Radiographic Emphysema in HIV Is Associated With Elevated Soluble CD14 and Nadir CD4

*Engi F. Attia, MD; Kathleen M. Akguñ, MD; Cherry Wongtrakool, MD; Matthew Bidwell Goetz, MD; Maria C. Rodriguez-Barradas, MD; David Rimland, MD; Sheldon T. Brown, MD; Guy W. Soo Hoo, MD, FCCP; Joon Kim, MD; Patty J. Lee, MD; Lynn M. Schnapp, MD; Amir Sharafkhaneh, MD, PhD, FCCP; Amy C. Justice, MD, PhD; and Kristina Crothers, MD*

CHEST 2014; 146(6):1543-1553

## **e-Appendix 1.**

### **METHODS**

#### **Study design and cohort**

Examinations of HIV-Associated Lung Emphysema (EXHALE) is an observational, longitudinal study, enrolling Veterans Aging Cohort Study (VACS) participants from the Atlanta, Bronx, Houston and Los Angeles Veterans Affairs (VA) Medical Centers since 2009 [Emory University Institutional Review Board #CR5\_IRB00005662, Bronx VA Medical Center Institutional Review Board #BRO-08-046, Institutional Review Board for Human Subject Research for Baylor College of Medicine and Affiliated Hospitals #H-25605, and VA Greater Los Angeles Healthcare System #PCC 2013-020186, respectively as well as the University of Washington Institutional Review Board #37257]. This study was conducted in accordance with the amended Declaration of Helsinki. EXHALE is a dedicated pulmonary substudy of VACS. COPD and/or asthma diagnoses were not required for participation. However, individuals with clinical diagnoses of lung disease other than COPD and/or asthma or respiratory tract infections in the 4 weeks preceding baseline measurements were excluded.

#### **Chest computed tomography (CT) scan examinations**

All participants underwent chest CT scans at enrollment. Non-contrast CT scan images were acquired using a standard acquisition protocol with moderate-dose radiation (~3.5 mSv). Images were 1-1.25 mm in thickness and were obtained at 0.5-0.625 mm intervals. Scans from the lung apices to the bases were obtained at end inspiration breath-hold in the supine position, using 16 and 64 multi-detector CT scanners

*Online supplements are not copyedited prior to posting.*

calibrated across centers using a standardized lung phantom. The lung phantom was sent to each site for scanning and standardization per research protocol.

### **Statistical analysis**

We also evaluated ordinal logistic regression models and multinomial regression models using a multilevel outcome of no emphysema, 1-10% emphysema and >10% emphysema. As these models demonstrated similar results for risk factors associated with >10% emphysema and power was limited in some groups, we present only results of the logistic regression models for simplicity. Pearson chi-square test statistics were used to assess model goodness-of-fit. All analyses were performed using STATA 12.0 (Stata Corp., College Station, TX).

*Online supplements are not copyedited prior to posting.*

**e-Table 1.** Baseline characteristics of HIV-infected participants by nadir CD4 cell count

|                                 | Nadir CD4 <200<br><i>n</i> = 69 | Nadir CD4 ≥200<br><i>n</i> = 45 | <i>p</i> -value |
|---------------------------------|---------------------------------|---------------------------------|-----------------|
| Age, median (IQR)               | 55 (50 – 58)                    | 54 (49 – 58)                    | 0.9             |
| Male, %                         | 99                              | 96                              | 0.6             |
| Race/ethnicity, %               |                                 |                                 |                 |
| Black                           | 75                              | 56                              | 0.03            |
| White                           | 10                              | 29                              |                 |
| Hispanic/other                  | 15                              | 15                              |                 |
| Cigarette smoking history       |                                 |                                 |                 |
| Never smoker, %                 | 15                              | 18                              | 0.4             |
| Former smoker, %                | 18                              | 27                              | 0.4             |
| <i>Pack-years, median (IQR)</i> | 22 (15 – 36)                    | 18 (5 – 48)                     | 0.6             |
| Current smoker, %               | 67                              | 55                              | 0.4             |
| <i>Pack-years, median (IQR)</i> | 22 (11 – 42)                    | 32 (14 – 40)                    | 0.5             |
| Other substance abuse, ever, %  |                                 |                                 |                 |
| Marijuana (smoked)              | 85                              | 84                              | 0.9             |
| Alcohol                         | 25                              | 23                              | 0.8             |
| Injection drug use              | 32                              | 31                              | 0.9             |
| COPD (FEV1/FVC <LLN), %         | 26                              | 11                              | 0.06            |
| % predicted DLCO, median (IQR)  | 59.0 (52.6 – 74.1)              | 64.7 (55.3 – 78.8)              | 0.2             |
| % predicted FEV1, median (IQR)  | 90.5 (80.6 – 103.4)             | 92.1 (82.9 – 103.1)             | 0.5             |
| Prior pneumonia, %              |                                 |                                 |                 |
| Bacterial community-acquired    | 23                              | 16                              | 0.3             |
| <i>Pneumocystis jiroveci</i>    | 1                               | 0                               | 1.0             |
| Mycobacterium tuberculosis      | 10                              | 4                               | 0.5             |
| Emphysema severity, %           |                                 |                                 |                 |
| None/negligible (0%)            | 30                              | 53                              | 0.07            |
| Trace (1-10%)                   | 29                              | 25                              |                 |
| Mild (11-25%)                   | 21                              | 18                              |                 |
| Moderate (26-50%)               | 7                               | 2                               |                 |
| Severe (51-75%)                 | 13                              | 2                               |                 |
| Very severe (>75%)              | 0                               | 0                               |                 |
| >10% emphysema                  | 41                              | 22                              | 0.04            |
| Emphysema distribution, %*      |                                 |                                 |                 |
| Diffuse emphysema               | 32                              | 22                              | 0.3             |
| Upper lung zone                 | 70                              | 47                              | 0.01            |
| Middle lung zone                | 49                              | 31                              | 0.06            |
| Lower lung zone                 | 33                              | 24                              | 0.3             |
| Emphysema type, %*              |                                 |                                 |                 |
| Centrilobular                   | 65                              | 44                              | 0.03            |
| Paraseptal                      | 35                              | 31                              | 0.7             |
| Panlobular                      | 3                               | 2                               | 1.0             |
| Bullous                         | 23                              | 13                              | 0.2             |
| Serum biomarkers, median (IQR)  |                                 |                                 |                 |
| IL-6 (pg/mL)                    | 1.72 (1.20 – 3.12)              | 1.90 (1.38 – 3.43)              | 0.6             |
| sCD14 (ng/mL)                   | 1631 (1392 – 2122)              | 1877 (1547 – 2152)              | 0.1             |
| D-dimer (µg/mL)                 | 0.28 (0.20 – 0.50)              | 0.23 (0.17 – 0.42)              | 0.3             |

*Online supplements are not copyedited prior to posting.*

HIV-related variables

|                                                     |                 |                 |        |
|-----------------------------------------------------|-----------------|-----------------|--------|
| CD4 cell count (cells/ $\mu$ L), median (IQR)       | 355 (223 – 504) | 531 (407 – 658) | <0.001 |
| Nadir CD4 cell count (cells/ $\mu$ L), median (IQR) | 70 (23 – 125)   | 272 (234 – 349) | <0.001 |
| Detectable HIV RNA ( $\geq$ 400 copies/mL)          | 25              | 13              | 0.2    |
| ART use                                             | 94              | 91              | 0.5    |

\*Percents do not add to 100% as individuals may have emphysema in more than one lung zone and more than one type of emphysema.

*Online supplements are not copyedited prior to posting.*

**e-Table 2.** Baseline characteristics of HIV-infected participants by >10% emphysema

|                                         | >10% emphysema<br><i>n</i> = 38 | ≤10% emphysema<br><i>n</i> = 76 | <i>p</i> -value |
|-----------------------------------------|---------------------------------|---------------------------------|-----------------|
| Age, median (IQR)                       | 57 (52 – 61)                    | 53 (47 – 58)                    | 0.01            |
| Male, %                                 | 97                              | 97                              | 1.0             |
| Race/ethnicity, %                       |                                 |                                 |                 |
| Black                                   | 71                              | 66                              | 0.08            |
| White                                   | 24                              | 14                              |                 |
| Hispanic/other                          | 5                               | 20                              |                 |
| Cigarette smoking history               |                                 |                                 |                 |
| Never smoker, %                         | 3                               | 22                              | 0.02            |
| Former smoker, %                        | 20                              | 22                              | 0.02            |
| <i>Pack-years, median (IQR)</i>         | 41 (15 – 50)                    | 17 (9 – 26)                     | 0.1             |
| Current smoker, %                       | 77                              | 56                              | 0.02            |
| <i>Pack-years, median (IQR)</i>         | 36 (12 – 49)                    | 23 (11 – 37)                    | 0.1             |
| Other substance abuse, ever, %          |                                 |                                 |                 |
| Marijuana (smoked)                      | 94                              | 80                              | 0.09            |
| Alcohol                                 | 22                              | 25                              | 0.8             |
| Injection drug use                      | 33                              | 31                              | 0.8             |
| COPD (FEV1/FVC <LLN), %                 | 42                              | 9                               | <0.001          |
| % predicted DLCO, median (IQR)          | 54.6 (44.5 – 64.2)              | 67.8 (57.2 – 78.6)              | <0.001          |
| % predicted FEV1, median (IQR)          | 87.5 (75.6 – 98.6)              | 92.6 (82.7 – 105.1)             | 0.06            |
| Prior pneumonia, %                      |                                 |                                 |                 |
| Bacterial community-acquired            | 29                              | 16                              | 0.1             |
| <i>Pneumocystis jiroveci</i>            | 0                               | 1                               | 1.0             |
| Mycobacterium tuberculosis              | 13                              | 5                               | 0.2             |
| Serum biomarkers, median (IQR)          |                                 |                                 |                 |
| IL-6 (pg/mL)                            | 1.79 (1.29 – 3.07)              | 1.82 (1.28 – 3.54)              | 0.8             |
| sCD14 (ng/mL)                           | 1883 (1521 – 2222)              | 1648 (1459 – 1982)              | 0.05            |
| D-dimer (μg/mL)                         | 0.27 (0.20 – 0.60)              | 0.26 (0.16 – 0.43)              | 0.2             |
| HIV-related variables                   |                                 |                                 |                 |
| CD4 cell count (cells/μL), median (IQR) | 384 (304 – 591)                 | 447 (323 – 633)                 | 0.3             |
| CD4 cell count <200, %                  | 21                              | 11                              | 0.2             |
| Nadir CD4 cell count <200, %            | 74                              | 54                              | 0.04            |
| Detectable HIV RNA (≥400 copies/mL)     | 24                              | 18                              | 0.6             |
| ART use, %                              | 92                              | 93                              | 1.0             |

*Online supplements are not copyedited prior to posting.*
